# Supplementary material for: Type 2 Diabetes Mellitus Increases the Risk to Hip Fracture in Postmenopausal Osteoporosis by Deteriorating the Trabecular Bone Microarchitecture and Bone Mass
Source: Hindawi journal article supplement (doi:10.1155/2019/3876957), 2019-11-07
Supplement: f1 [file 3876957.f1.pdf]

| Groups | 8 (wks)                |                  | 10 (wks)               |                  | 14 (wks)               |                  |
|--------|------------------------|------------------|------------------------|------------------|------------------------|------------------|
|        | Blood Glucose (Mmol/l) | Body Weight (gm) | Blood Glucose (mmol/l) | Body Weight (gm) | Blood Glucose (Mmol/l) | Body Weight (gm) |
| GP. I  | 6.3 ± 0.26             | 251.8 ± 39.7     | 6.34 ± 0.46            | 243.6 ± 26.2     | 6.62 ± 0.53            | 255.5 ± 29.8     |
| GP.II  | 21.30 ± 8.16           | 318.8 ± 67.1     | 24.50 ± 2.90           | 203.5 ± 25.98    | 26.50 ± 1.02           | 229.8 ± 48.5     |
| GP.III | 6.15 ± 2.03            | 296.7 ± 13.7     | 6.49 ± 0.88            | 261.3 ± 22.1     | 6.33 ± 0.58            | 252.9 ± 27.4     |
| GP.IV  | 24.63 ± 6.58           | 256 ± 40.6       | 19.98 ± 8.05           | 247.3 ± 23.5     | 23.29 ± 4.58           | 262.1 ± 20.0     |

**Supplementary data file:** The table shows the Mean ± S.D of body weight (gms) and blood glucose level (mmol/l) changes in GP. I, II, III and IV at 8, 10 and 14 weeks of the onset of diabetes before sacrifice.
